# Supplementary material
Source: PubMed Central journal article supplement (PMC6495167)
Supplement: 10.1194_D092197_jlr.D092197-1.pdf [file 10.1194_D092197_jlr.D092197-1.pdf]

# Supplemental information

## for

### Acylation derivatization based LC-MS analysis of vitamin D metabolites from finger-prick blood

Juan Le(乐娟)<sup>1</sup>, Teng-Fei Yuan(袁腾飞)<sup>1</sup>, Jia-Qing Geng(耿嘉庆)<sup>2</sup>, Shao-Ting Wang(王少亭)<sup>1\*</sup>, Yan Li(李艳)<sup>1\*</sup>, Bing-Hong Zhang(张炳宏)<sup>2\*</sup>

\* These authors jointly supervised this work.

<sup>1</sup>Renmin Hospital of Wuhan University, Department of Clinical Laboratory

<sup>2</sup>Renmin Hospital of Wuhan University, Pediatric Department

430060 Wuhan, China

Tel.: +86-27-88041911; fax: +86-27-88041911

E-mail address: shaotingw@163.com; liyanlcms@163.com; zbhong6288@163.com

**RUNNING TITLE:** Finger-Prick Analysis of Vitamin D by Acylation

DISCLOSURE STATEMENT: The authors have nothing to disclose.

**Supplemental Table S1. MRM parameters for original vitamin D metabolites and their INC derivatization products.**

| Targets                                                 | Precursor ion (m/z) | Product ion (m/z) | DP (v) | CE (eV) |
|---------------------------------------------------------|---------------------|-------------------|--------|---------|
| 25(OH)D <sub>2</sub> <sup>a</sup>                       | 413.2               | 395.4             | 90     | 13      |
| 25(OH)D <sub>2</sub> <sup>b</sup>                       |                     | 159.1             | 90     | 35      |
| 25(OH)D <sub>2</sub> -d3 <sup>a</sup>                   | 416.3               | 398.4             | 60     | 12      |
| 25(OH)D <sub>2</sub> -d3 <sup>b</sup>                   |                     | 358.5             | 60     | 13      |
| 25(OH)D <sub>3</sub> <sup>a</sup>                       | 401.2               | 365.3             | 100    | 15      |
| epi-25(OH)D <sub>3</sub> <sup>a</sup>                   |                     |                   |        |         |
| 25(OH)D <sub>3</sub> <sup>b</sup>                       | 401.2               | 383.3             | 100    | 13      |
| epi-25(OH)D <sub>3</sub> <sup>b</sup>                   |                     |                   |        |         |
| 25(OH)D <sub>3</sub> -d6 <sup>a</sup>                   | 407.2               | 371.3             | 90     | 14      |
| 25(OH)D <sub>3</sub> -d6 <sup>b</sup>                   |                     | 389.4             | 90     | 13      |
| 24,25(OH) <sub>2</sub> D <sub>2</sub> <sup>a</sup>      | 429.4               | 393.4             | 90     | 12      |
| 24,25(OH) <sub>2</sub> D <sub>2</sub> <sup>b</sup>      |                     | 411.7             | 90     | 11      |
| 24,25(OH) <sub>2</sub> D <sub>3</sub> <sup>a</sup>      | 417.4               | 381.4             | 120    | 17      |
| 24,25(OH) <sub>2</sub> D <sub>3</sub> <sup>b</sup>      |                     | 399.5             | 120    | 18      |
| 1,25(OH) <sub>2</sub> D <sub>2</sub> <sup>a</sup>       | 429.3               | 411.4             | 60     | 9       |
| 1,25(OH) <sub>2</sub> D <sub>2</sub> <sup>b</sup>       |                     | 393.4             | 60     | 15      |
| 1,25(OH) <sub>2</sub> D <sub>3</sub> <sup>a</sup>       | 417.4               | 399.4             | 90     | 9       |
| 1,25(OH) <sub>2</sub> D <sub>3</sub> <sup>b</sup>       |                     | 381.4             | 100    | 12      |
| 25(OH)D <sub>2</sub> -INC <sup>a</sup>                  | 518.3               | 124.0             | 90     | 65      |
| 25(OH)D <sub>2</sub> -INC <sup>b</sup>                  |                     | 395.4             | 90     | 28      |
| 25(OH)D <sub>2</sub> -d3-INC <sup>a</sup>               | 521.4               | 124.0             | 80     | 70      |
| 25(OH)D <sub>2</sub> -d3-INC <sup>b</sup>               |                     | 398.3             | 80     | 25      |
| 25(OH)D <sub>3</sub> -INC <sup>a</sup>                  | 506.3               | 124.0             | 90     | 70      |
| 25(OH)D <sub>3</sub> -INC <sup>b</sup>                  |                     | 365.3             | 90     | 30      |
| epi-25(OH)D <sub>3</sub> -INC <sup>a</sup>              | 506.4               | 124.0             | 90     | 70      |
| epi-25(OH)D <sub>3</sub> -INC <sup>b</sup>              |                     | 365.4             | 90     | 30      |
| 25(OH)D <sub>3</sub> -d6-INC <sup>a</sup>               | 512.3               | 124.0             | 90     | 70      |
| 25(OH)D <sub>3</sub> -d6-INC <sup>b</sup>               |                     | 371.2             | 90     | 25      |
| 24,25(OH) <sub>2</sub> D <sub>2</sub> -INC <sup>a</sup> | 534.4               | 124.0             | 60     | 66      |
| 24,25(OH) <sub>2</sub> D <sub>2</sub> -INC <sup>b</sup> |                     | 393.2             | 50     | 20      |
| 24,25(OH) <sub>2</sub> D <sub>3</sub> -INC <sup>a</sup> | 522.5               | 124.0             | 60     | 62      |
| 24,25(OH) <sub>2</sub> D <sub>3</sub> -INC <sup>b</sup> |                     | 381.2             | 50     | 26      |
| 1,25(OH) <sub>2</sub> D <sub>2</sub> -INC <sup>a</sup>  | 534.4               | 124.0             | 80     | 70      |
| 1,25(OH) <sub>2</sub> D <sub>2</sub> -INC <sup>b</sup>  |                     | 393.3             | 80     | 24      |
| 1,25(OH) <sub>2</sub> D <sub>3</sub> -INC <sup>a</sup>  | 522.5               | 124.0             | 80     | 70      |
| 1,25(OH) <sub>2</sub> D <sub>3</sub> -INC <sup>b</sup>  |                     | 399.0             | 60     | 13      |

Abbreviation: MRM, Multiple Reaction Monitoring; DP, Decluttering Potential; CE, Collision Energy.

<sup>a</sup> Quantifier ion.

<sup>b</sup> Qualifier ion.

**Supplemental Table S2. Schematic of INC derivatization of 25(OH)D and structure information of related targets.**

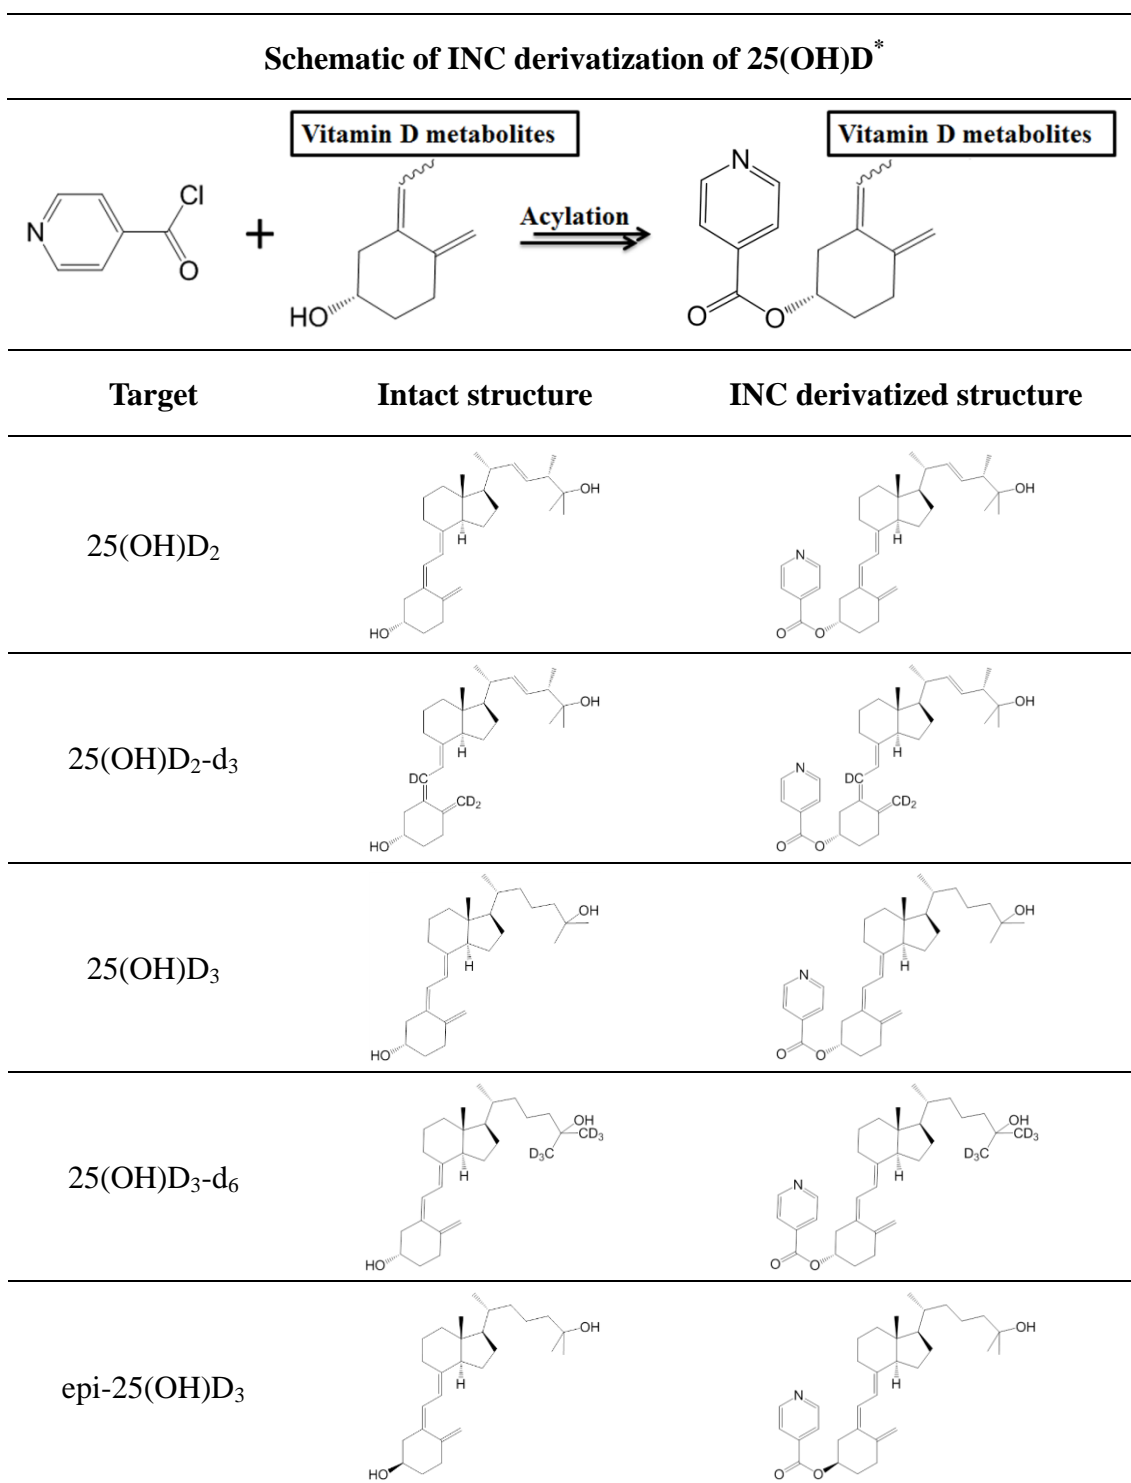

\* During MRM detection, the isonicotinic fragment showed best intensity for all the 25(OH)D-INC species so that the protonized isonicotinic acid ion ( $m/z$  124.0) was chosen as product ion for quantification.

**Supplemental Table S3. The calibration curves and sensitivity for the INC derivatization method.**

| Targets*                 | Retention time (min) | Linear range (ng/mL) | Calibration curves |           |        | LLOQ (ng/mL) |
|--------------------------|----------------------|----------------------|--------------------|-----------|--------|--------------|
|                          |                      |                      | Slope              | Intercept | $R^2$  |              |
| 25(OH)D <sub>2</sub>     | 10.65                | 1.0-100.0            | 0.0352             | -0.0096   | 0.9980 | 1.0          |
| 25(OH)D <sub>3</sub>     | 10.55                | 1.0-100.0            | 0.0301             | 0.0390    | 0.9990 | 1.0          |
| epi-25(OH)D <sub>3</sub> | 10.70                | 1.0-100.0            | 0.0434             | 0.0372    | 0.9970 | 1.0          |

\* The targets were detected as the 25(OH)D-INC forms.

**Supplemental Table S4. Intra- and inter-assay accuracy and imprecision of the the INC derivatization method.**

| Targets                        | Theoretical value<br>(ng/mL) | Intraday (n = 6)                              |                      | Interday (n = 30)                             |                      |
|--------------------------------|------------------------------|-----------------------------------------------|----------------------|-----------------------------------------------|----------------------|
|                                |                              | Measured<br>concentration<br>(ng/mL) $\pm$ SD | Recoveries%<br>(CV%) | Measured<br>concentration<br>(ng/mL) $\pm$ SD | Recoveries%<br>(CV%) |
| <b>25(OH)D<sub>2</sub></b>     |                              |                                               |                      |                                               |                      |
| LLOQ-level                     | 1.0                          | 0.9 $\pm$ 0.2                                 | 93.5 (16.8)          | 0.9 $\pm$ 0.2                                 | 90.6 (17.9)          |
| low-level                      | 10.0                         | 9.1 $\pm$ 0.8                                 | 90.6 (9.2)           | 9.2 $\pm$ 0.8                                 | 91.1 (9.3)           |
| medium-level                   | 30.0                         | 28.5 $\pm$ 2.5                                | 95.1 (8.8)           | 28.2 $\pm$ 2.6                                | 94.1 (9.1)           |
| high-level                     | 100.0                        | 97.1 $\pm$ 6.3                                | 97.1 (6.5)           | 96.5 $\pm$ 7.8                                | 96.5 (8.1)           |
| <b>25(OH)D<sub>3</sub></b>     |                              |                                               |                      |                                               |                      |
| LLOQ-level                     | 1.0                          | 0.9 $\pm$ 0.1                                 | 88.8 (14.1)          | 0.9 $\pm$ 0.1                                 | 87.4 (14.8)          |
| low-level                      | 10.0                         | 9.2 $\pm$ 0.6                                 | 92.3 (6.2)           | 9.0 $\pm$ 0.7                                 | 89.9 (8.1)           |
| medium-level                   | 30.0                         | 27.6 $\pm$ 2.0                                | 92.1 (7.1)           | 28.0 $\pm$ 2.3                                | 93.2 (8.3)           |
| high-level                     | 100.0                        | 100.7 $\pm$ 5.4                               | 100.7 (5.4)          | 95.5 $\pm$ 7.1                                | 95.5 (7.4)           |
| <b>epi-25(OH)D<sub>3</sub></b> |                              |                                               |                      |                                               |                      |
| LLOQ-level                     | 1.0                          | 0.9 $\pm$ 0.1                                 | 86.5 (12.1)          | 1.0 $\pm$ 0.1                                 | 102.5 (11.5)         |
| low-level                      | 10.0                         | 9.7 $\pm$ 0.7                                 | 97.2 (6.8)           | 9.6 $\pm$ 0.8                                 | 96.4 (8.7)           |
| medium-level                   | 30.0                         | 31.1 $\pm$ 1.9                                | 103.6 (6.1)          | 28.7 $\pm$ 2.8                                | 95.6 (9.6)           |
| high-level                     | 100.0                        | 95.4 $\pm$ 6.1                                | 95.4 (6.4)           | 93.6 $\pm$ 6.5                                | 93.6 (6.9)           |

**Supplemental Table S5. Certified and measured concentrations of 25(OH)D<sub>2</sub>, 25(OH)D<sub>3</sub> and epi-25(OH)D<sub>3</sub> from the reference material SRM927a.**

| SRM     | Targets                  | Certified value<br>(ng/mL) | Measured value<br>(n=5, ng/mL) | Recoveries (%) | CV (%) |
|---------|--------------------------|----------------------------|--------------------------------|----------------|--------|
| 927a    | 25(OH)D <sub>2</sub>     |                            |                                |                |        |
|         | level 1                  | 0.5 <sup>b</sup>           | - <sup>c</sup>                 | -              | -      |
|         | level 2                  | 0.8 <sup>a</sup>           | - <sup>c</sup>                 | -              | -      |
|         | level 3                  | 13.3 <sup>a</sup>          | 12.5 ± 0.9                     | 94.2           | 7.5    |
|         | level 4                  | 0.6 <sup>b</sup>           | - <sup>c</sup>                 | -              | -      |
|         | 25(OH)D <sub>3</sub>     |                            |                                |                |        |
|         | level 1                  | 28.8 <sup>a</sup>          | 27.5 ± 2.0                     | 95.6           | 7.3    |
|         | level 2                  | 18.1 <sup>a</sup>          | 16.9 ± 1.1                     | 93.5           | 6.4    |
|         | level 3                  | 19.8 <sup>a</sup>          | 18.6 ± 1.5                     | 94.1           | 8.1    |
|         | level 4                  | 29.4 <sup>a</sup>          | 27.8 ± 1.9                     | 94.4           | 7.0    |
|         | epi-25(OH)D <sub>3</sub> |                            |                                |                |        |
|         | level 1                  | 1.8 <sup>a</sup>           | 1.6 ± 0.2                      | 90.5           | 10.1   |
| level 2 | 1.3 <sup>a</sup>         | 1.1 ± 0.1                  | 86.3                           | 12.5           |        |
| level 3 | 1.2 <sup>b</sup>         | 1.0 ± 0.1                  | 84.1                           | 10.2           |        |
| level 4 | 26.0 <sup>a</sup>        | 24.9 ± 1.8                 | 95.6                           | 7.1            |        |

<sup>a</sup> Certified value.

<sup>b</sup> Reference value.

<sup>c</sup> Lower than LLOQ.

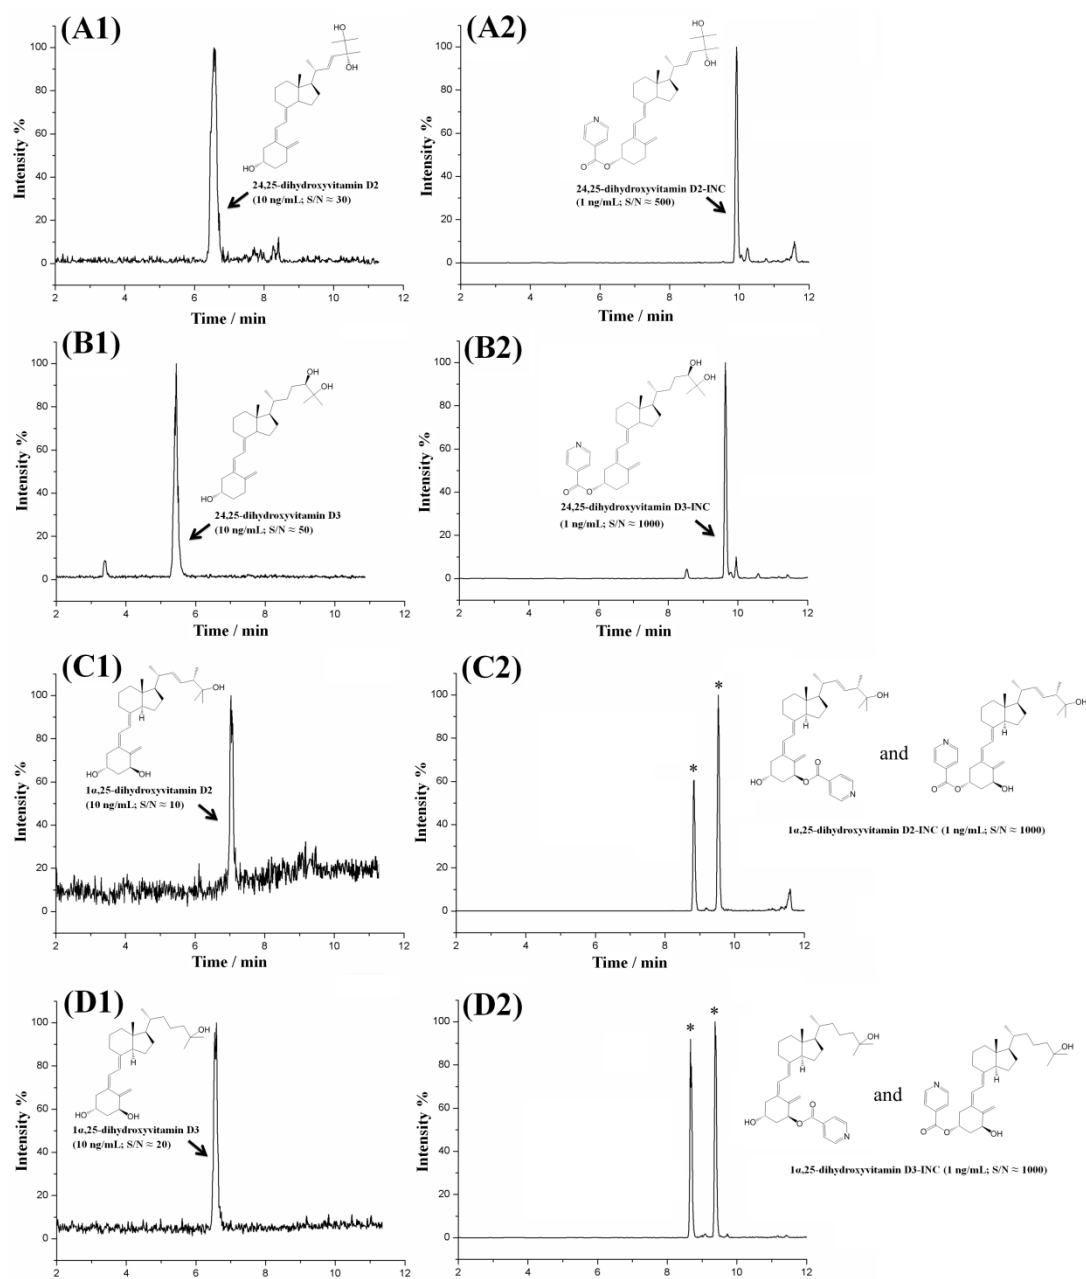

**Supplemental Figure S1.** The typical LC-MS/MS chromatograms of 24,25(OH)<sub>2</sub>D<sub>2</sub>, 24,25(OH)<sub>2</sub>D<sub>3</sub>, 1,25(OH)<sub>2</sub>D<sub>2</sub> and 1,25(OH)<sub>2</sub>D<sub>3</sub> before (A1, B1, C1 and D1, 10 ng/mL) and after (A2, B2, C2 and D2, 1 ng/mL) INC derivatization.

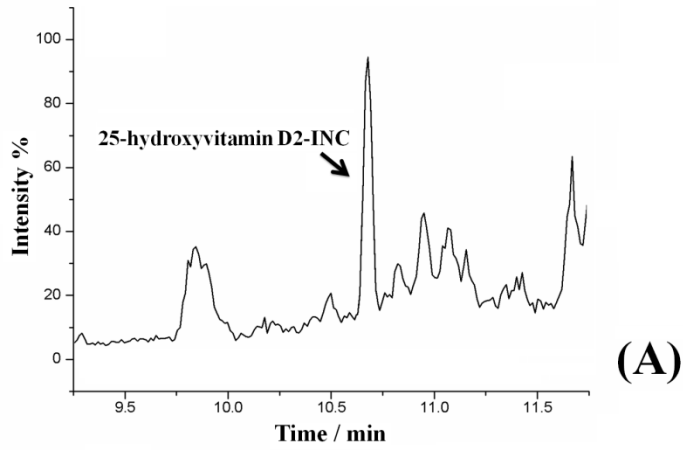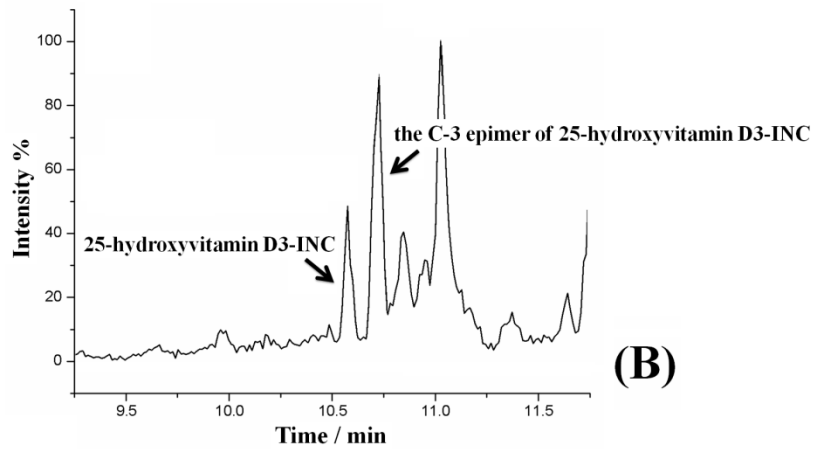

**Supplemental Figure S2.** The typical LC-MS/MS chromatograms of 25(OH)D-INC in spiked plasma sample on LLOQ-level, (A) 25(OH)D<sub>2</sub>-INC; (B) 25(OH)D<sub>3</sub>-INC and epi-25(OH)D<sub>3</sub>-INC.



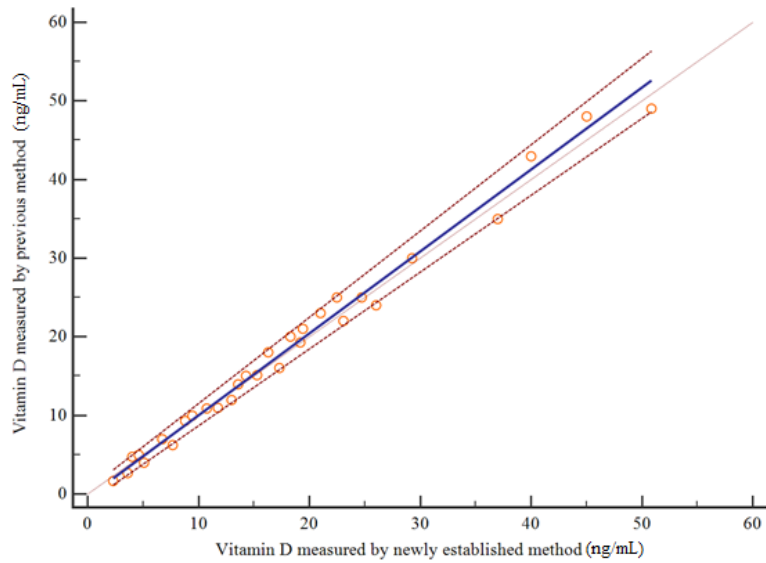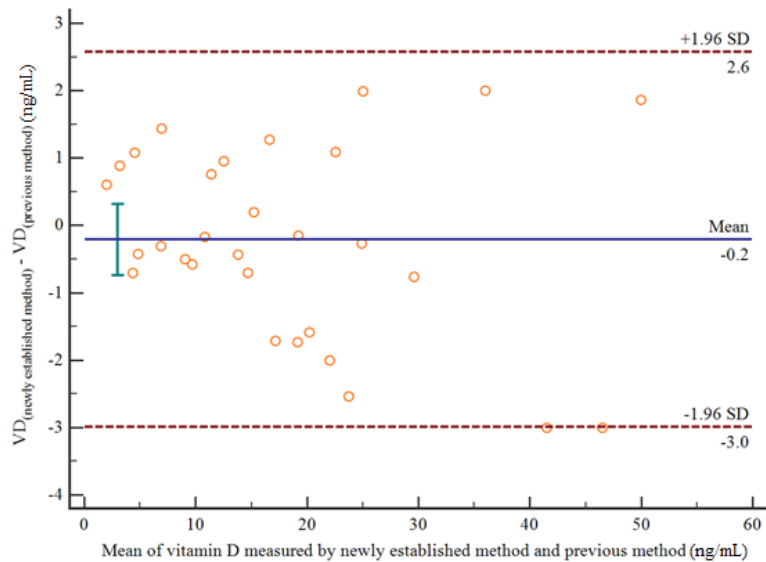

**Supplemental Figure S3. Comparison of vitamin D values measured by newly established method and previous method in 30 samples (plasma). (A) Passing-Bablok regress analysis for newly established method and previous method. (B) Bland-Altman plot showed the bias between the newly established method and previous method.**

## **Investigation of reaction yields**

Plasma (100  $\mu\text{L}$ ) from high-level of QC samples was transferred into a polypropylene conical centrifuge tube. After mixing with ACN (200  $\mu\text{L}$ ), dichloromethane (900  $\mu\text{L}$ ) was added, vortexed (1 min) and centrifuged (3000 g, 30 s) for liquid-liquid extraction (LLE). The resulted supernatant (900  $\mu\text{L}$ ) was then transferred into a new polypropylene conical centrifuge tube, dried under nitrogen gas and redissolved in a mixture (200  $\mu\text{L}$ ) of ethyl acetate and dichloromethane (1/3, v/v). Such mixture was then divided into two parts (each 100  $\mu\text{L}$ ). For Part-I, INC solution (10  $\mu\text{L}$ ) was added for derivatization. For Part-II, ACN (10  $\mu\text{L}$ ) was added for control. The final mixture was then dried under nitrogen gas again and reconstituted with initial mobile phase (100  $\mu\text{L}$ ) for LC-MS/MS analysis of 25(OH)D species. The reaction yields could be evaluated by comparing the results from Part-I to Part-II.
